# Supplementary material
Source: MDPI journal article supplement (https://www.mdpi.com/2075-163X/6/4/114)

# Supplementary Materials: Selective Flotation of Calcite from Fluorite: A Novel Reagent Schedule

Zhiyong Gao, Yuesheng Gao, Yiyang Zhu, Yuehua Hu and Wei Sun

## 1. Methodology

In the present study, an  $L_{25}(5^6)$  OAD procedure is used with four factors at five levels to search for the optimal reagent scheme for the selective separation calcite from fluorite. The design involved four factors at five levels as shown in Table S1.

**Table S1.** Attribution of factors to the levels in  $L_{25}(5^6)$  OAD experiments.

| Level | pH   | SOA Dosage (mg/L) | CA Dosage (mg/L) | NaF Dosage (mg/L) |
|-------|------|-------------------|------------------|-------------------|
| 1     | 8    | 2                 | 20               | 50                |
| 2     | 9    | 4                 | 30               | 100               |
| 3     | 10   | 6                 | 40               | 200               |
| 4     | 11   | 8                 | 50               | 300               |
| 5     | 11.5 | 10                | 60               | 400               |

As shown in Table S2, the chosen  $L_{25}(5^6)$  array has 25 rows with six columns. The two response (dependent) variables were fluorite recovery ( $R_f$ ) and calcite recovery ( $R_c$ ).

**Table S2.**  $L_{25}(5^6)$  OAD matrix with the experimental results.

| No. | pH   | SOA | CA | NaF | $R_f$ | $R_c$ |
|-----|------|-----|----|-----|-------|-------|
| 1   | 8    | 2   | 30 | 300 | 9.15  | 59.68 |
| 2   | 9    | 2   | 60 | 400 | 5.52  | 58.26 |
| 3   | 10   | 2   | 50 | 50  | 10.03 | 56.95 |
| 4   | 11   | 2   | 20 | 200 | 72.86 | 75.12 |
| 5   | 11.5 | 2   | 40 | 100 | 34.24 | 65.26 |
| 6   | 8    | 4   | 40 | 200 | 8.15  | 47.75 |
| 7   | 9    | 4   | 30 | 100 | 28.76 | 74.86 |
| 8   | 10   | 4   | 60 | 300 | 8.12  | 69.95 |
| 9   | 11   | 4   | 50 | 400 | 14.92 | 74.12 |
| 10  | 11.5 | 4   | 20 | 50  | 77.35 | 83.26 |
| 11  | 8    | 6   | 20 | 400 | 13.16 | 59.95 |
| 12  | 9    | 6   | 40 | 50  | 20.28 | 69.21 |
| 13  | 10   | 6   | 30 | 200 | 44.95 | 78.26 |
| 14  | 11   | 6   | 60 | 100 | 9.05  | 71.1  |
| 15  | 11.5 | 6   | 50 | 300 | 20.16 | 78.29 |
| 16  | 8    | 8   | 50 | 100 | 7.88  | 62.26 |
| 17  | 9    | 8   | 20 | 300 | 61.72 | 81.32 |
| 18  | 10   | 8   | 40 | 400 | 30.32 | 75.12 |
| 19  | 11   | 8   | 30 | 50  | 64.11 | 80.68 |
| 20  | 11.5 | 8   | 60 | 200 | 11.24 | 75.26 |
| 21  | 8    | 10  | 60 | 50  | 9.16  | 59.72 |
| 22  | 9    | 10  | 50 | 200 | 14.18 | 61.28 |
| 23  | 10   | 10  | 20 | 100 | 71.58 | 78.89 |
| 24  | 11   | 10  | 40 | 300 | 32.69 | 76.59 |
| 25  | 11.5 | 10  | 30 | 400 | 68.25 | 80.05 |

## 2. Direct Evaluation Analysis

Direct evaluation analysis was done on the four factors above, respectively, by taking fluorite recovery ( $R_f$ ) and calcite recovery ( $R_c$ ) as the evaluation indexes.  $K_{jm}$  denotes the flotation recovery at the  $m$  level of  $j$  factor. There are  $j = 4$  factors and every factor has  $m = 5$  levels, while  $\bar{K}_{jm}$  denotes the average values of  $K_{jm}$ .

$$R_j = \max(\bar{K}_{j1}, \bar{K}_{j2}, \bar{K}_{j3}, \bar{K}_{j4}, \bar{K}_{j5}) - \min(\bar{K}_{j1}, \bar{K}_{j2}, \bar{K}_{j3}, \bar{K}_{j4}, \bar{K}_{j5})$$

$R_j$  means the range of  $j$  factor. A higher  $R_j$  value means that this factor has a more significant effect on the flotation recovery, and, accordingly, is a relatively a more important influence factor.

**Table S3.** Results of range analysis.

|       |             | Flotation Recovery |       |       |       |
|-------|-------------|--------------------|-------|-------|-------|
|       |             | pH                 | SOA   | CA    | NaF   |
| $R_f$ | $\bar{K}_1$ | 9.5                | 26.36 | 59.33 | 36.19 |
|       | $\bar{K}_2$ | 26.09              | 27.46 | 43.04 | 30.30 |
|       | $\bar{K}_3$ | 33                 | 21.52 | 25.14 | 30.28 |
|       | $\bar{K}_4$ | 38.73              | 35.05 | 13.43 | 26.37 |
|       | $\bar{K}_5$ | 42.25              | 39.17 | 8.62  | 26.43 |
|       | $R_f$       | 32.75              | 17.65 | 50.72 | 9.82  |
|       |             |                    |       |       |       |
| $R_c$ | $\bar{K}_1$ | 57.88              | 63.05 | 75.71 | 69.96 |
|       | $\bar{K}_2$ | 68.99              | 69.99 | 74.71 | 70.47 |
|       | $\bar{K}_3$ | 71.83              | 71.36 | 66.79 | 67.53 |
|       | $\bar{K}_4$ | 75.52              | 74.93 | 66.58 | 73.17 |
|       | $\bar{K}_5$ | 76.42              | 71.31 | 66.86 | 69.5  |
|       | $R_c$       | 18.55              | 11.87 | 8.85  | 5.63  |
|       |             |                    |       |       |       |

From Table S3, for both  $R_f$  and  $R_c$ , pH level is a more important influence factor. As pH increases from 8 to 9,  $R_f$  increases from 9.5% to 26.1% and 57.9% to 69.0% for  $R_c$ . With pH level increasing from 9 to 10 or more,  $R_c$  increases very slowly while  $R_f$  increases steadily. In pursuit of a higher  $R_c$  and a lower  $R_f$ , pH 9 is a preferred pH level.

Among four influence factors, NaF dosage is a less important factor for both  $R_f$  and  $R_c$ . A dosage of 100 mg/L or more is satisfying.

CA dosage is a much more important influence factor for  $R_c$ . It has less influence on  $R_f$ . A dosage of 50 or 60 mg/L is preferable.

For SOA, it is obvious that 6 mg/L is a preferred dosage.

From OAD experiments and direct evaluation analysis, the preferred reagent scheme of NaF 200 mg/L, CA 50 mg/L and SOA 6 mg/L at pH 9 obtained by the OFAT method, was acceptable for the selective removal of calcite from fluorite.

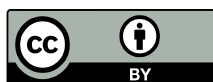

Supplement: s1 [file s1]
